# Supplementary material
Source: publisher site journal article supplement (https://www.dovepress.com/article/322875)
Supplement: Supplementary file 1 [file get_supplementary_file.php]

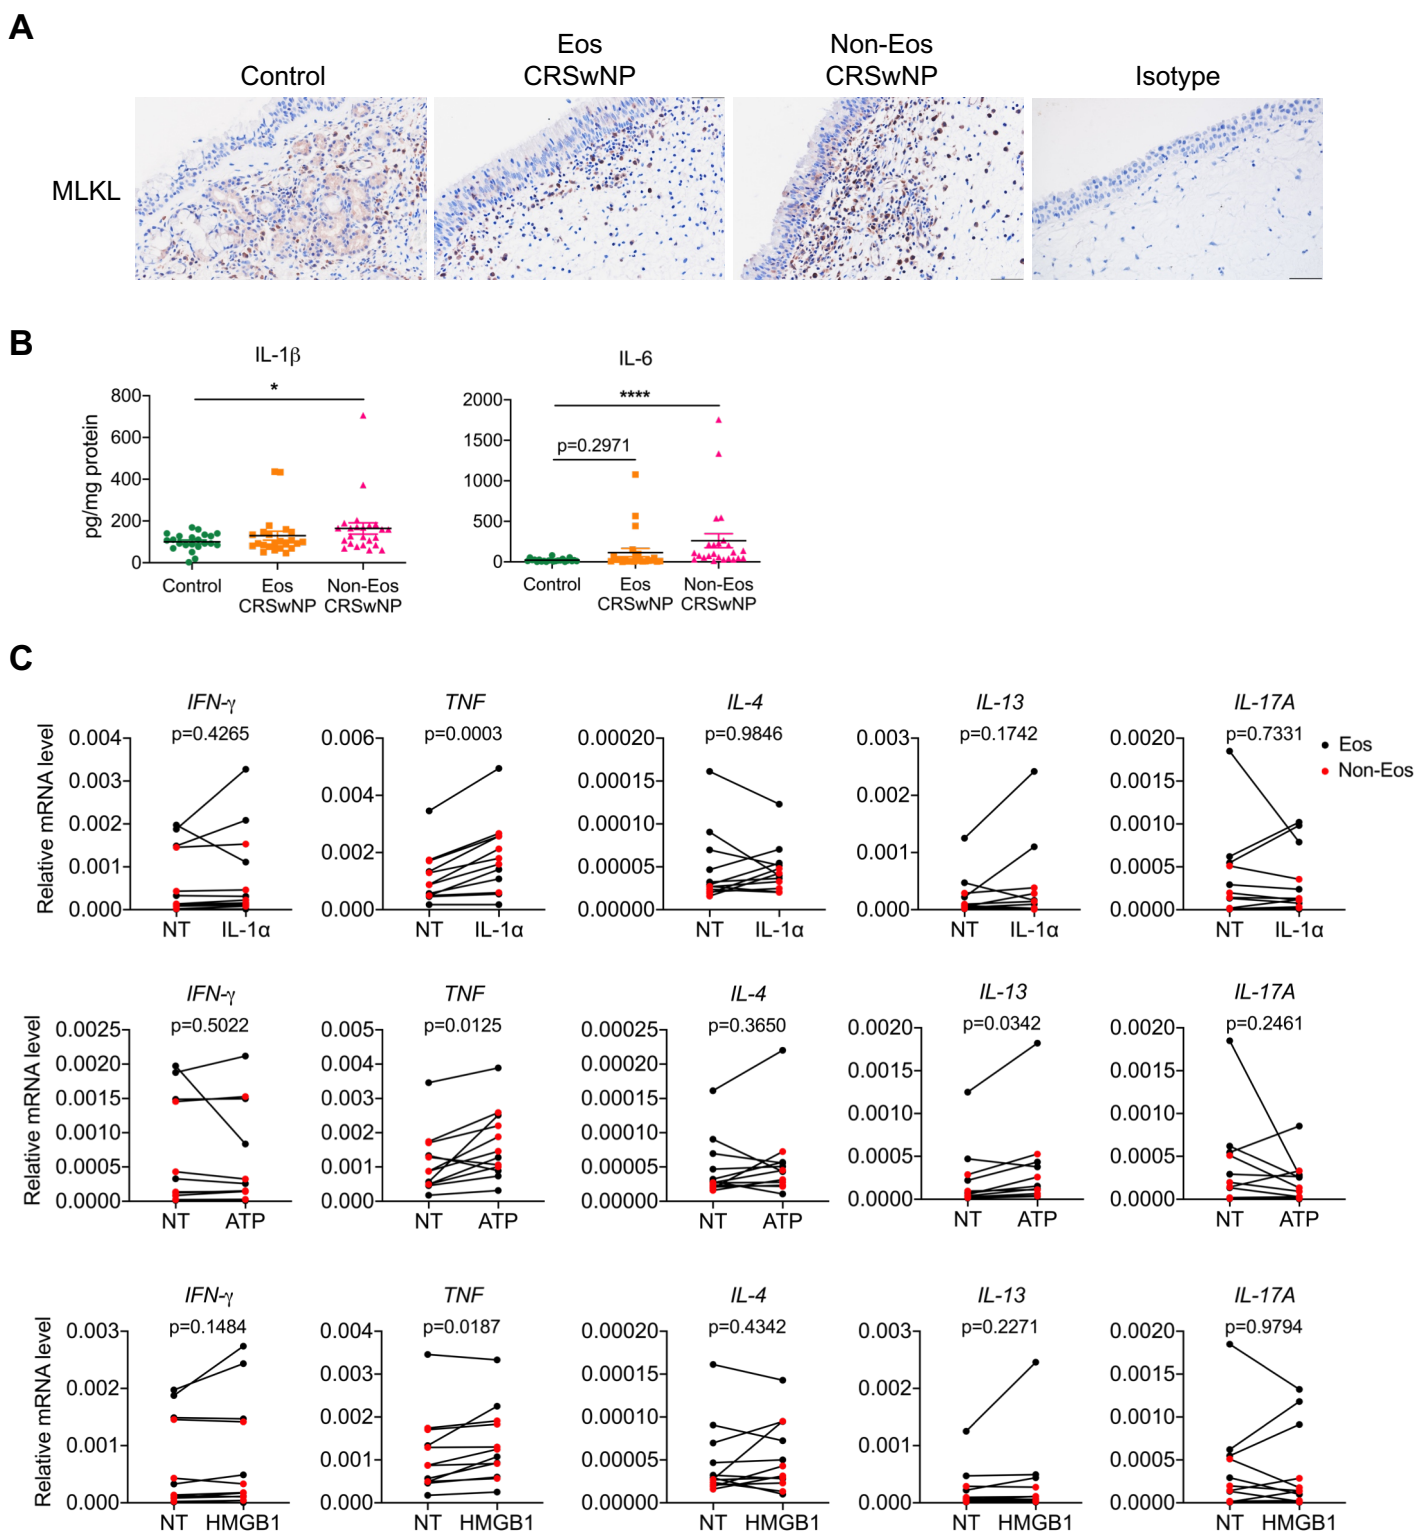

**Figure S1. (A)** IHC staining of MLKL in control nasal mucosa or nasal polyps. Scale bars: 50  $\mu$ m. **(B)** The protein levels of IL-1 $\beta$  and IL-6 in nasal mucosa homogenates were detected by ELISA (n=22-24 per group). **(C)** qPCR analysis of inflammatory cytokines mRNAs (normalized to beta-actin) in primary nasal polyps cells before and after IL-1 $\alpha$  (50 ng/ml), ATP (1 mM) or HMGB1 (1  $\mu$ g/ml) stimulation for 8 h (n=12). The data were analyzed by paired Student's t test.

**A**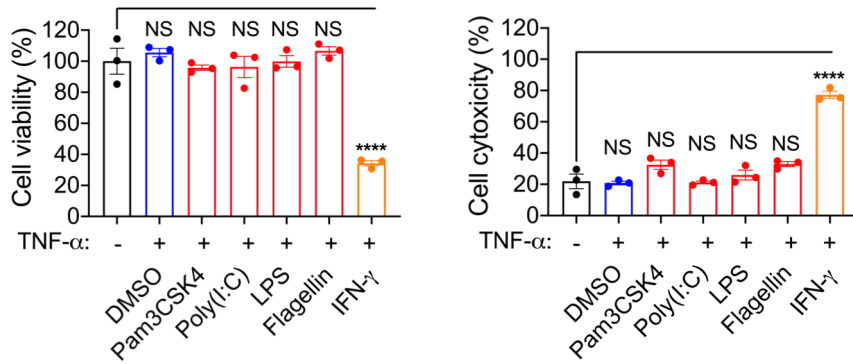**B**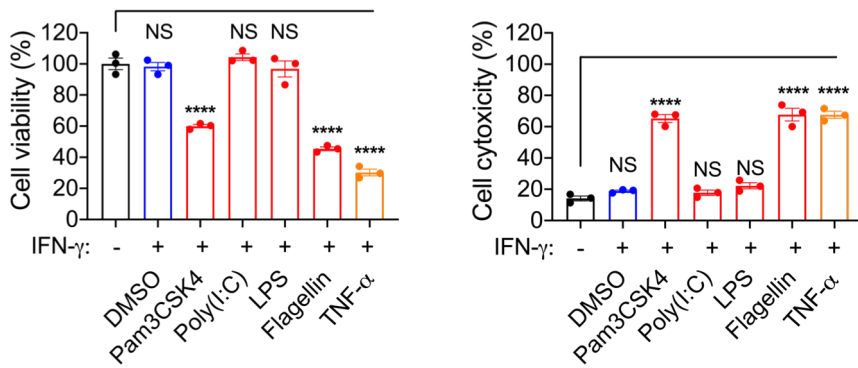**C**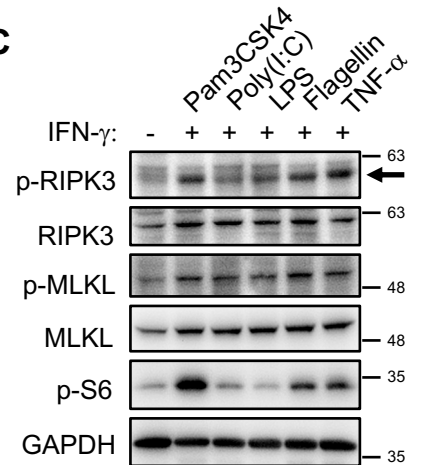

**Figure S2. (A-B)** THP-1 cells were treated with a combination of TNF- $\alpha$  (50 ng/ml), IFN- $\gamma$  (50 ng/ml) and Pam3CSK4 (1  $\mu$ g/ml), Poly(I:C) (1  $\mu$ g/ml), LPS (1  $\mu$ g/ml) or Flagellin (1  $\mu$ g/ml) for 48 h. Cell viability and cytotoxicity were measured by intracellular ATP content or lactate dehydrogenase (LDH) release respectively. **(C)** Immunoblots of cell lysates from THP-1 cells treated with IFN- $\gamma$  (50 ng/ml) plus Pam3CSK4 (1  $\mu$ g/ml), Poly(I:C) (1  $\mu$ g/ml), LPS (1  $\mu$ g/ml), Flagellin (1  $\mu$ g/ml) or TNF- $\alpha$  (50 ng/ml) for 36 h. The arrow indicates p-RIPK3 band. The data were representative of 3 independent experiments and shown as mean $\pm$ SEM. \*\*\*\* $p$ <0.0001; NS, not significant; by one-way ANOVA.
